# Supplementary material for: Prognostic Value of Tumor Regression Grade on MR in Rectal Cancer: A Large-Scale, Single-Center Experience
Source: PubMed Central journal article supplement — Korean J Radiol. 2020 Jun 24;21(9):1065–76. doi: 10.3348/kjr.2019.0797 (PMC7371618; doi:10.3348/kjr.2019.0797), 2020-06-24
Supplement: kjr-21-1065-s002.pdf [file kjr-21-1065-s002.pdf]

**Supplementary Table 1. Results of Univariate Analysis of MRI Features for Overall Survival**

| Characteristics           | Pre-CRT MRI |       |             |          | Post-CRT MRI |       |              |          |
|---------------------------|-------------|-------|-------------|----------|--------------|-------|--------------|----------|
|                           | Number      | HR    | 95% CI      | <i>P</i> | Number       | HR    | 95% CI       | <i>P</i> |
| <b>T category*</b>        |             |       |             |          |              |       |              |          |
| Good                      | 75          | 0.942 | 0.491–1.808 | 0.858    | 166          | 1.552 | 0.884–2.727  | 0.126    |
| Poor                      | 246         |       |             |          | 155          |       |              |          |
| <b>N category</b>         |             |       |             |          |              |       |              |          |
| Negative                  | 58          | 0.764 | 0.390–1.495 | 0.432    | 240          | 2.295 | 1.281–4.114  | 0.005    |
| Positive                  | 263         |       |             |          | 81           |       |              |          |
| <b>Extramesorectal LN</b> |             |       |             |          |              |       |              |          |
| Negative                  | 234         | 0.966 | 0.504–1.853 | 0.918    | 285          | 1.896 | 0.888–4.047  | 0.098    |
| Positive                  | 87          |       |             |          | 36           |       |              |          |
| <b>EMVI</b>               |             |       |             |          |              |       |              |          |
| Negative                  | 279         | 1.522 | 0.713–3.249 | 0.278    | 294          | 3.314 | 1.547–7.101  | 0.002    |
| Positive                  | 42          |       |             |          | 27           |       |              |          |
|                           | Mean, SD    | HR    | 95% CI      | <i>P</i> | Mean, SD     | HR    | 95% CI       | <i>P</i> |
| EMD (mm)                  | 4.74, 5.11  | 1.019 | 0.970–1.070 | 0.452    | 2.38, 3.39   | 1.082 | 1.015–1.153  | 0.016    |
| MRF (mm)                  | 5.66, 5.38  | 0.993 | 0.942–1.046 | 0.783    | 6.54, 5.93   | 1.021 | 0.975–1.070  | 0.380    |
| <b>mrTRG</b>              |             |       |             |          |              |       |              |          |
| 5-point grading           |             |       |             |          |              | 6.615 | 1.188–31.993 | 0.024    |
| Binomial classification   |             |       |             |          |              | 2.172 | 1.205–3.913  | 0.010    |

\*Tumors are graded into two groups (good and poor responders) according to ypT category. ypT1, T2, T3a are classified as good responders and ypT3b, T3c, T3d, and T4 as poor responders. CI = confidence interval, CRT = chemoradiotherapy, EMD = extramural depth, EMVI = extramural venous invasion, HR = hazard ratio, LN = lymph node, MRF = mesorectal fascia, mrTRG = MRI-based tumor regression grading, SD = standard deviation
